# Supplementary material for: Sex-biased gene expression and gene-regulatory networks of sex-biased adverse event drug targets and drug metabolism genes
Source: PubMed Central journal article supplement (PMC10763002; doi:10.1186/s40360-023-00727-1), 2024-01-02
Supplement: 40360_2023_727_MOESM1_ESM.pdf [file 40360_2023_727_MOESM1_ESM.pdf]

# 230510\_rstudio\_sex\_bias\_drugs\_info

Jennifer Fisher

2022-12-21

System which operations were done on:  
my laptop

GitHub Repo:  
230321\_JLF\_Sex\_bias\_adverse\_events

Docker:  
jenfisher7/rstudio\_sex\_bias\_drugs

Directory of operations:  
~/Documents/230321\_JLF\_Sex\_bias\_adverse\_events

Scripts being edited for operations:  
NA

Data being used:

```
sessionInfo()
```

```
## R version 4.2.2 (2022-10-31)
## Platform: x86_64-pc-linux-gnu (64-bit)
## Running under: Ubuntu 22.04.1 LTS
##
## Matrix products: default
## BLAS: /usr/lib/x86_64-linux-gnu/openblas-pthread/libblas.so.3
## LAPACK: /usr/lib/x86_64-linux-gnu/openblas-pthread/libopenblas-p0.3.20.so
##
## locale:
## [1] LC_CTYPE=en_US.UTF-8 LC_NUMERIC=C
## [3] LC_TIME=en_US.UTF-8 LC_COLLATE=en_US.UTF-8
## [5] LC_MONETARY=en_US.UTF-8 LC_MESSAGES=en_US.UTF-8
## [7] LC_PAPER=en_US.UTF-8 LC_NAME=C
## [9] LC_ADDRESS=C LC_TELEPHONE=C
## [11] LC_MEASUREMENT=en_US.UTF-8 LC_IDENTIFICATION=C
##
## attached base packages:
## [1] stats graphics grDevices utils datasets methods base
##
## loaded via a namespace (and not attached):
## [1] digest_0.6.31 R6_2.5.1 lifecycle_1.0.3 jsonlite_1.8.4
## [5] magrittr_2.0.3 evaluate_0.19 stringi_1.7.8 cachem_1.0.6
## [9] rlang_1.0.6 cli_3.5.0 rstudioapi_0.14 jquerylib_0.1.4
## [13] bslib_0.4.2 vctrs_0.5.1 rmarkdown_2.19 tools_4.2.2
## [17] stringr_1.5.0 glue_1.6.2 xfun_0.36 yaml_2.3.6
## [21] fastmap_1.1.0 compiler_4.2.2 htmltools_0.5.4 knitr_1.41
## [25] sass_0.4.4
```

```
# Listing packages
installed.packages()[,c(1,3)]
```

| ##                  | Package            | Version    |
|---------------------|--------------------|------------|
| ## abind            | "abind"            | "1.4-5"    |
| ## affy             | "affy"             | "1.76.0"   |
| ## affyio           | "affyio"           | "1.68.0"   |
| ## amap             | "amap"             | "0.8-19"   |
| ## annotate         | "annotate"         | "1.76.0"   |
| ## AnnotationDbi    | "AnnotationDbi"    | "1.60.0"   |
| ## AnnotationFilter | "AnnotationFilter" | "1.22.0"   |
| ## AnnotationForge  | "AnnotationForge"  | "1.40.0"   |
| ## AnnotationHub    | "AnnotationHub"    | "3.6.0"    |
| ## apcluster        | "apcluster"        | "1.4.10"   |
| ## ape              | "ape"              | "5.6-2"    |
| ## aplot            | "aplot"            | "0.1.9"    |
| ## ashr             | "ashr"             | "2.2-54"   |
| ## askpass          | "askpass"          | "1.1"      |
| ## assertthat       | "assertthat"       | "0.2.1"    |
| ## backports        | "backports"        | "1.4.1"    |
| ## base64           | "base64"           | "2.0.1"    |
| ## base64enc        | "base64enc"        | "0.1-3"    |
| ## base64url        | "base64url"        | "1.4"      |
| ## bayestestR       | "bayestestR"       | "0.13.0"   |
| ## beanplot         | "beanplot"         | "1.3.1"    |
| ## bench            | "bench"            | "1.1.2"    |
| ## BgeeDB           | "BgeeDB"           | "2.24.0"   |
| ## BH               | "BH"               | "1.78.0-0" |
| ## Biobase          | "Biobase"          | "2.58.0"   |
| ## BiocBaseUtils    | "BiocBaseUtils"    | "1.0.0"    |
| ## BiocFileCache    | "BiocFileCache"    | "2.6.0"    |
| ## BiocGenerics     | "BiocGenerics"     | "0.44.0"   |
| ## BiocIO           | "BiocIO"           | "1.8.0"    |
| ## BiocManager      | "BiocManager"      | "1.30.19"  |
| ## BiocParallel     | "BiocParallel"     | "1.32.5"   |
| ## BiocVersion      | "BiocVersion"      | "3.16.0"   |
| ## biomaRt          | "biomaRt"          | "2.54.0"   |
| ## Biostrings       | "Biostrings"       | "2.66.0"   |
| ## bit              | "bit"              | "4.0.5"    |
| ## bit64            | "bit64"            | "4.0.5"    |
| ## bitops           | "bitops"           | "1.0-7"    |
| ## biwt             | "biwt"             | "1.0.1"    |
| ## blob             | "blob"             | "1.2.3"    |
| ## brew             | "brew"             | "1.0-8"    |
| ## brio             | "brio"             | "1.1.3"    |
| ## broom            | "broom"            | "1.0.2"    |
| ## broom.mixed      | "broom.mixed"      | "0.2.9.4"  |
| ## bslib            | "bslib"            | "0.4.2"    |
| ## bumphunter       | "bumphunter"       | "1.40.0"   |
| ## BumpyMatrix      | "BumpyMatrix"      | "1.6.0"    |
| ## cachem           | "cachem"           | "1.0.6"    |
| ## callr            | "callr"            | "3.7.3"    |
| ## car              | "car"              | "3.1-1"    |
| ## carData          | "carData"          | "3.0-5"    |
| ## caret            | "caret"            | "6.0-93"   |

|                       |                      |          |
|-----------------------|----------------------|----------|
| ## Category           | "Category"           | "2.64.0" |
| ## caTools            | "caTools"            | "1.18.2" |
| ## celestial          | "celestial"          | "1.4.6"  |
| ## cellranger         | "cellranger"         | "1.1.0"  |
| ## checkmate          | "checkmate"          | "2.1.0"  |
| ## ChemmineR          | "ChemmineR"          | "3.50.0" |
| ## chron              | "chron"              | "2.3-58" |
| ## circlize           | "circlize"           | "0.4.15" |
| ## classInt           | "classInt"           | "0.4-8"  |
| ## cli                | "cli"                | "3.5.0"  |
| ## clipr              | "clipr"              | "0.8.0"  |
| ## clock              | "clock"              | "0.6.1"  |
| ## clue               | "clue"               | "0.3-63" |
| ## clusterProfiler    | "clusterProfiler"    | "4.6.0"  |
| ## coda               | "coda"               | "0.19-4" |
| ## CoGAPS             | "CoGAPS"             | "3.18.0" |
| ## cogena             | "cogena"             | "1.32.0" |
| ## colorspace         | "colorspace"         | "2.0-3"  |
| ## combinat           | "combinat"           | "0.0-8"  |
| ## commonmark         | "commonmark"         | "1.8.1"  |
| ## ComplexHeatmap     | "ComplexHeatmap"     | "2.14.0" |
| ## ComplexUpset       | "ComplexUpset"       | "1.3.3"  |
| ## conflicted         | "conflicted"         | "1.1.0"  |
| ## coop               | "coop"               | "0.6-3"  |
| ## CoreGx             | "CoreGx"             | "2.2.0"  |
| ## corrplot           | "corrplot"           | "0.92"   |
| ## cowplot            | "cowplot"            | "1.1.1"  |
| ## cpp11              | "cpp11"              | "0.4.3"  |
| ## crayon             | "crayon"             | "1.5.2"  |
| ## credentials        | "credentials"        | "1.3.2"  |
| ## crosstalk          | "crosstalk"          | "1.2.0"  |
| ## curl               | "curl"               | "4.3.3"  |
| ## customCMPdb        | "customCMPdb"        | "1.8.0"  |
| ## data.table         | "data.table"         | "1.14.6" |
| ## datawizard         | "datawizard"         | "0.6.5"  |
| ## DBI                | "DBI"                | "1.1.3"  |
| ## dbplyr             | "dbplyr"             | "2.2.1"  |
| ## DelayedArray       | "DelayedArray"       | "0.24.0" |
| ## DelayedMatrixStats | "DelayedMatrixStats" | "1.20.0" |
| ## dendextend         | "dendextend"         | "1.16.0" |
| ## DEoptimR           | "DEoptimR"           | "1.0-11" |
| ## desc               | "desc"               | "1.4.2"  |
| ## DESeq2             | "DESeq2"             | "1.38.2" |
| ## devtools           | "devtools"           | "2.4.5"  |
| ## DEXSeq             | "DEXSeq"             | "1.44.0" |
| ## dials              | "dials"              | "1.1.0"  |
| ## DiceDesign         | "DiceDesign"         | "1.9"    |
| ## diffobj            | "diffobj"            | "0.3.5"  |
| ## digest             | "digest"             | "0.6.31" |
| ## discrim            | "discrim"            | "1.0.0"  |
| ## docopt             | "docopt"             | "0.7.1"  |
| ## doParallel         | "doParallel"         | "1.0.17" |

|                       |                      |           |
|-----------------------|----------------------|-----------|
| ## doRNG              | "doRNG"              | "1.8.3"   |
| ## DOSE               | "DOSE"               | "3.24.2"  |
| ## dotwhisker         | "dotwhisker"         | "0.7.4"   |
| ## downlit            | "downlit"            | "0.4.2"   |
| ## downloader         | "downloader"         | "0.4"     |
| ## dplyr              | "dplyr"              | "1.0.10"  |
| ## drugbankR          | "drugbankR"          | "1.5"     |
| ## DT                 | "DT"                 | "0.26"    |
| ## dtplyr             | "dtplyr"             | "1.2.2"   |
| ## e1071              | "e1071"              | "1.7-12"  |
| ## earth              | "earth"              | "5.3.1"   |
| ## edgeR              | "edgeR"              | "3.40.1"  |
| ## ellipse            | "ellipse"            | "0.4.3"   |
| ## ellipsis           | "ellipsis"           | "0.3.2"   |
| ## emmeans            | "emmeans"            | "1.8.3"   |
| ## enrichplot         | "enrichplot"         | "1.18.3"  |
| ## EnsDb.Hsapiens.v75 | "EnsDb.Hsapiens.v75" | "2.99.0"  |
| ## ensemblDb          | "ensemblDb"          | "2.22.0"  |
| ## estimability       | "estimability"       | "1.4.1"   |
| ## etrunct            | "etrunct"            | "0.1"     |
| ## evaluate           | "evaluate"           | "0.19"    |
| ## ExperimentHub      | "ExperimentHub"      | "2.6.0"   |
| ## factoextra         | "factoextra"         | "1.0.7"   |
| ## FactoMineR         | "FactoMineR"         | "2.7"     |
| ## fansi              | "fansi"              | "1.0.3"   |
| ## farver             | "farver"             | "2.1.1"   |
| ## fastcluster        | "fastcluster"        | "1.2.3"   |
| ## fastmap            | "fastmap"            | "1.1.0"   |
| ## fastmatch          | "fastmatch"          | "1.1-3"   |
| ## fgsea              | "fgsea"              | "1.24.0"  |
| ## filelock           | "filelock"           | "1.0.2"   |
| ## flashClust         | "flashClust"         | "1.01-2"  |
| ## fmcsR              | "fmcsR"              | "1.40.0"  |
| ## fontawesome        | "fontawesome"        | "0.4.0"   |
| ## forcats            | "forcats"            | "0.5.2"   |
| ## foreach            | "foreach"            | "1.5.2"   |
| ## formatR            | "formatR"            | "1.13"    |
| ## Formula            | "Formula"            | "1.2-4"   |
| ## fs                 | "fs"                 | "1.5.2"   |
| ## furr               | "furr"               | "0.3.1"   |
| ## futile.logger      | "futile.logger"      | "1.4.3"   |
| ## futile.options     | "futile.options"     | "1.0.1"   |
| ## future             | "future"             | "1.30.0"  |
| ## future.apply       | "future.apply"       | "1.10.0"  |
| ## gargle             | "gargle"             | "1.2.1"   |
| ## gbm                | "gbm"                | "2.1.8.1" |
| ## genefilter         | "genefilter"         | "1.80.2"  |
| ## geneplotter        | "geneplotter"        | "1.76.0"  |
| ## generics           | "generics"           | "0.1.3"   |
| ## GenomeInfoDb       | "GenomeInfoDb"       | "1.34.4"  |
| ## GenomeInfoDbData   | "GenomeInfoDbData"   | "1.2.9"   |
| ## GenomicAlignments  | "GenomicAlignments"  | "1.34.0"  |

|                    |                   |           |
|--------------------|-------------------|-----------|
| ## GenomicFeatures | "GenomicFeatures" | "1.50.3"  |
| ## GenomicRanges   | "GenomicRanges"   | "1.50.2"  |
| ## GEOquery        | "GEOquery"        | "2.66.0"  |
| ## gert            | "gert"            | "1.9.1"   |
| ## GetoptLong      | "GetoptLong"      | "1.0.5"   |
| ## ggalluvial      | "ggalluvial"      | "0.12.3"  |
| ## ggdendro        | "ggdendro"        | "0.1.23"  |
| ## ggforce         | "ggforce"         | "0.4.1"   |
| ## ggfun           | "ggfun"           | "0.0.9"   |
| ## ggnewscale      | "ggnewscale"      | "0.4.8"   |
| ## ggplot2         | "ggplot2"         | "3.4.0"   |
| ## ggplotify       | "ggplotify"       | "0.1.0"   |
| ## ggpubr          | "ggpubr"          | "0.5.0"   |
| ## ggraph          | "ggraph"          | "2.1.0"   |
| ## ggrepel         | "ggrepel"         | "0.9.2"   |
| ## ggsci           | "ggsci"           | "2.9"     |
| ## ggsignif        | "ggsignif"        | "0.6.4"   |
| ## ggstance        | "ggstance"        | "0.3.6"   |
| ## ggtree          | "ggtree"          | "3.6.2"   |
| ## gh              | "gh"              | "1.3.1"   |
| ## gitcreds        | "gitcreds"        | "0.1.2"   |
| ## glmnet          | "glmnet"          | "4.1-6"   |
| ## GlobalOptions   | "GlobalOptions"   | "0.1.2"   |
| ## globals         | "globals"         | "0.16.2"  |
| ## glue            | "glue"            | "1.6.2"   |
| ## GO.db           | "GO.db"           | "3.16.0"  |
| ## googledrive     | "googledrive"     | "2.0.0"   |
| ## googlesheets4   | "googlesheets4"   | "1.0.1"   |
| ## GOsemSim        | "GOsemSim"        | "2.24.0"  |
| ## GOstats         | "GOstats"         | "2.64.0"  |
| ## gower           | "gower"           | "1.0.1"   |
| ## GPfit           | "GPfit"           | "1.0-8"   |
| ## gplots          | "gplots"          | "3.1.3"   |
| ## gprofiler2      | "gprofiler2"      | "0.2.1"   |
| ## graph           | "graph"           | "1.76.0"  |
| ## graphlayouts    | "graphlayouts"    | "0.8.4"   |
| ## gridBase        | "gridBase"        | "0.4-7"   |
| ## gridExtra       | "gridExtra"       | "2.3"     |
| ## gridGraphics    | "gridGraphics"    | "0.5-1"   |
| ## GSEABase        | "GSEABase"        | "1.60.0"  |
| ## gson            | "gson"            | "0.0.9"   |
| ## gsubfn          | "gsubfn"          | "0.7"     |
| ## gtable          | "gtable"          | "0.3.1"   |
| ## gtools          | "gtools"          | "3.9.4"   |
| ## hardhat         | "hardhat"         | "1.2.0"   |
| ## hash            | "hash"            | "2.2.6.2" |
| ## haven           | "haven"           | "2.5.1"   |
| ## HDF5Array       | "HDF5Array"       | "1.26.0"  |
| ## HDO.db          | "HDO.db"          | "0.99.1"  |
| ## here            | "here"            | "1.0.1"   |
| ## hexbin          | "hexbin"          | "1.28.2"  |
| ## highr           | "highr"           | "0.10"    |

|                           |                          |           |
|---------------------------|--------------------------|-----------|
| ## hms                    | "hms"                    | "1.1.2"   |
| ## htmltools              | "htmltools"              | "0.5.4"   |
| ## htmlwidgets            | "htmlwidgets"            | "1.6.0"   |
| ## httpuv                 | "httpuv"                 | "1.6.7"   |
| ## httr                   | "httr"                   | "1.4.4"   |
| ## hwriter                | "hwriter"                | "1.3.2.1" |
| ## ids                    | "ids"                    | "1.0.1"   |
| ## igraph                 | "igraph"                 | "1.3.5"   |
| ## illuminaio             | "illuminaio"             | "0.40.0"  |
| ## infer                  | "infer"                  | "1.0.4"   |
| ## ini                    | "ini"                    | "0.3.1"   |
| ## insight                | "insight"                | "0.18.8"  |
| ## interactiveDisplayBase | "interactiveDisplayBase" | "1.36.0"  |
| ## inum                   | "inum"                   | "1.0-4"   |
| ## invgamma               | "invgamma"               | "1.1"     |
| ## ipred                  | "ipred"                  | "0.9-13"  |
| ## IRanges                | "IRanges"                | "2.32.0"  |
| ## IRdisplay              | "IRdisplay"              | "1.1"     |
| ## IRkernel               | "IRkernel"               | "1.3.1"   |
| ## irlba                  | "irlba"                  | "2.3.5.1" |
| ## isoband                | "isoband"                | "0.2.7"   |
| ## iterators              | "iterators"              | "1.0.14"  |
| ## jquerylib              | "jquerylib"              | "0.1.4"   |
| ## jsonlite               | "jsonlite"               | "1.8.4"   |
| ## KEGGREST               | "KEGGREST"               | "1.38.0"  |
| ## kernlab                | "kernlab"                | "0.9-31"  |
| ## klaR                   | "klaR"                   | "1.7-1"   |
| ## knitr                  | "knitr"                  | "1.41"    |
| ## kohonen                | "kohonen"                | "3.0.11"  |
| ## labeling               | "labeling"               | "0.4.2"   |
| ## labelled               | "labelled"               | "2.10.0"  |
| ## lambda.r               | "lambda.r"               | "1.2.4"   |
| ## later                  | "later"                  | "1.3.0"   |
| ## lava                   | "lava"                   | "1.7.0"   |
| ## lazyeval               | "lazyeval"               | "0.2.2"   |
| ## leaps                  | "leaps"                  | "3.1"     |
| ## lhs                    | "lhs"                    | "1.1.6"   |
| ## libcoin                | "libcoin"                | "1.0-9"   |
| ## Liblinear              | "Liblinear"              | "2.10-22" |
| ## lifecycle              | "lifecycle"              | "1.0.3"   |
| ## limma                  | "limma"                  | "3.54.0"  |
| ## listenv                | "listenv"                | "0.9.0"   |
| ## littler                | "littler"                | "0.3.17"  |
| ## lme4                   | "lme4"                   | "1.1-31"  |
| ## locfit                 | "locfit"                 | "1.5-9.7" |
| ## lsa                    | "lsa"                    | "0.73.3"  |
| ## lubridate              | "lubridate"              | "1.9.0"   |
| ## magicaxis              | "magicaxis"              | "2.2.14"  |
| ## magrittr               | "magrittr"               | "2.0.3"   |
| ## mapproj                | "mapproj"                | "1.2.9"   |
| ## maps                   | "maps"                   | "3.4.1"   |
| ## margins                | "margins"                | "0.3.26"  |

|                         |                        |              |
|-------------------------|------------------------|--------------|
| ## markdown             | "markdown"             | "1.4"        |
| ## marray               | "marray"               | "1.76.0"     |
| ## mashr                | "mashr"                | "0.2.69"     |
| ## MASS                 | "MASS"                 | "7.3-58.1"   |
| ## matrixcalc           | "matrixcalc"           | "1.0-6"      |
| ## MatrixGenerics       | "MatrixGenerics"       | "1.10.0"     |
| ## MatrixModels         | "MatrixModels"         | "0.5-1"      |
| ## matrixStats          | "matrixStats"          | "0.63.0"     |
| ## mclust               | "mclust"               | "6.0.0"      |
| ## memoise              | "memoise"              | "2.0.1"      |
| ## mime                 | "mime"                 | "0.12"       |
| ## minfi                | "minfi"                | "1.44.0"     |
| ## miniUI               | "miniUI"               | "0.1.1.1"    |
| ## minga                | "minga"                | "1.2.5"      |
| ## mixsqp               | "mixsqp"               | "0.3-48"     |
| ## modeldata            | "modeldata"            | "1.0.1"      |
| ## modelenv             | "modelenv"             | "0.1.0"      |
| ## ModelMetrics         | "ModelMetrics"         | "1.2.2.2"    |
| ## modelr               | "modelr"               | "0.1.10"     |
| ## multcompView         | "multcompView"         | "0.1-8"      |
| ## MultiAssayExperiment | "MultiAssayExperiment" | "1.24.0"     |
| ## multtest             | "multtest"             | "2.54.0"     |
| ## munsell              | "munsell"              | "0.5.0"      |
| ## mvtnorm              | "mvtnorm"              | "1.1-3"      |
| ## naivebayes           | "naivebayes"           | "0.9.7"      |
| ## netZooR              | "netZooR"              | "1.2.1"      |
| ## NISTunits            | "NISTunits"            | "1.0.1"      |
| ## nloptr               | "nloptr"               | "2.0.3"      |
| ## NMF                  | "NMF"                  | "0.25"       |
| ## nnet                 | "nnet"                 | "7.3-18"     |
| ## norlmix              | "norlmix"              | "1.3-0"      |
| ## numDeriv             | "numDeriv"             | "2016.8-1.1" |
| ## openssl              | "openssl"              | "2.0.5"      |
| ## org.Hs.eg.db         | "org.Hs.eg.db"         | "3.16.0"     |
| ## pamr                 | "pamr"                 | "1.56.1"     |
| ## pandaR               | "pandaR"               | "1.30.0"     |
| ## parallelly           | "parallelly"           | "1.33.0"     |
| ## parameters           | "parameters"           | "0.20.0"     |
| ## parsnip              | "parsnip"              | "1.0.3"      |
| ## partykit             | "partykit"             | "1.2-16"     |
| ## pasilla              | "pasilla"              | "1.26.0"     |
| ## patchwork            | "patchwork"            | "1.1.2"      |
| ## pbdZMQ               | "pbdZMQ"               | "0.3-8"      |
| ## pbkrtest             | "pbkrtest"             | "0.5.1"      |
| ## penalized            | "penalized"            | "0.9-52"     |
| ## permute              | "permute"              | "0.9-7"      |
| ## PharmacGx            | "PharmacGx"            | "3.2.0"      |
| ## pheatmap             | "pheatmap"             | "1.0.12"     |
| ## piano                | "piano"                | "2.14.0"     |
| ## pillar               | "pillar"               | "1.8.1"      |
| ## pkgbuild             | "pkgbuild"             | "1.3.1"      |
| ## pkgconfig            | "pkgconfig"            | "2.0.3"      |



|                       |                      |              |
|-----------------------|----------------------|--------------|
| ## pkgdown            | "pkgdown"            | "2.0.6"      |
| ## pkgload            | "pkgload"            | "1.3.1"      |
| ## PLIER              | "PLIER"              | "0.99.0"     |
| ## plogr              | "plogr"              | "0.2.0"      |
| ## plotly             | "plotly"             | "4.10.1"     |
| ## plotmo             | "plotmo"             | "3.6.2"      |
| ## plotrix            | "plotrix"            | "3.8-2"      |
| ## plyr               | "plyr"               | "1.8.8"      |
| ## png                | "png"                | "0.1-8"      |
| ## polyclip           | "polyclip"           | "1.10-4"     |
| ## polynom            | "polynom"            | "1.4-1"      |
| ## pracma             | "pracma"             | "2.4.2"      |
| ## praise             | "praise"             | "1.0.0"      |
| ## prediction         | "prediction"         | "0.3.14"     |
| ## preprocessCore     | "preprocessCore"     | "1.60.1"     |
| ## prettyunits        | "prettyunits"        | "1.1.1"      |
| ## pROC               | "pROC"               | "1.18.0"     |
| ## processx           | "processx"           | "3.8.0"      |
| ## prodlim            | "prodlim"            | "2019.11.13" |
| ## profmem            | "profmem"            | "0.6.0"      |
| ## profvis            | "profvis"            | "0.3.7"      |
| ## progress           | "progress"           | "1.2.2"      |
| ## progressr          | "progressr"          | "0.12.0"     |
| ## projectR           | "projectR"           | "1.14.0"     |
| ## ProliferativeIndex | "ProliferativeIndex" | "1.0.1"      |
| ## promises           | "promises"           | "1.2.0.1"    |
| ## ProtGenerics       | "ProtGenerics"       | "1.30.0"     |
| ## proto              | "proto"              | "1.0.0"      |
| ## proxy              | "proxy"              | "0.4-27"     |
| ## ps                 | "ps"                 | "1.7.2"      |
| ## purrr              | "purrr"              | "1.0.0"      |
| ## quadprog           | "quadprog"           | "1.5-8"      |
| ## quantreg           | "quantreg"           | "5.94"       |
| ## quantro            | "quantro"            | "1.32.0"     |
| ## questionr          | "questionr"          | "0.7.7"      |
| ## qvalue             | "qvalue"             | "2.30.0"     |
| ## R.cache            | "R.cache"            | "0.16.0"     |
| ## R.methodsS3        | "R.methodsS3"        | "1.8.2"      |
| ## R.oo               | "R.oo"               | "1.25.0"     |
| ## R.utils            | "R.utils"            | "2.12.2"     |
| ## R6                 | "R6"                 | "2.5.1"      |
| ## ragg               | "ragg"               | "1.2.4"      |
| ## randomForest       | "randomForest"       | "4.7-1.1"    |
| ## ranger             | "ranger"             | "0.14.1"     |
| ## RANN               | "RANN"               | "2.6.1"      |
| ## rappdirs           | "rappdirs"           | "0.3.3"      |
| ## RBGL               | "RBGL"               | "1.74.0"     |
| ## rcmdcheck          | "rcmdcheck"          | "1.4.0"      |
| ## RColorBrewer       | "RColorBrewer"       | "1.1-3"      |
| ## Rcpp               | "Rcpp"               | "1.0.9"      |
| ## RcppArmadillo      | "RcppArmadillo"      | "0.11.4.2.1" |
| ## RcppEigen          | "RcppEigen"          | "0.3.3.9.3"  |

|                 |                |            |
|-----------------|----------------|------------|
| ## RcppGSL      | "RcppGSL"      | "0.3.12"   |
| ## RcppTOML     | "RcppTOML"     | "0.1.7"    |
| ## RCurl        | "RCurl"        | "1.98-1.9" |
| ## RCy3         | "RCy3"         | "2.18.0"   |
| ## reactome.db  | "reactome.db"  | "1.82.0"   |
| ## readr        | "readr"        | "2.1.3"    |
| ## readxl       | "readxl"       | "1.4.1"    |
| ## recipes      | "recipes"      | "1.0.3"    |
| ## recount3     | "recount3"     | "1.8.0"    |
| ## registry     | "registry"     | "0.5-1"    |
| ## relations    | "relations"    | "0.6-12"   |
| ## rematch      | "rematch"      | "1.0.1"    |
| ## rematch2     | "rematch2"     | "2.1.2"    |
| ## remotes      | "remotes"      | "2.4.2"    |
| ## repr         | "repr"         | "1.1.4"    |
| ## reprex       | "reprex"       | "2.0.2"    |
| ## reshape      | "reshape"      | "0.8.9"    |
| ## reshape2     | "reshape2"     | "1.4.4"    |
| ## restfulr     | "restfulr"     | "0.0.15"   |
| ## reticulate   | "reticulate"   | "1.26"     |
| ## Rgraphviz    | "Rgraphviz"    | "2.42.0"   |
| ## rhdf5        | "rhdf5"        | "2.42.0"   |
| ## rhdf5filters | "rhdf5filters" | "1.10.0"   |
| ## Rhdf5lib     | "Rhdf5lib"     | "1.20.0"   |
| ## Rhtslib      | "Rhtslib"      | "2.0.0"    |
| ## rJava        | "rJava"        | "1.0-6"    |
| ## rjson        | "rjson"        | "0.2.21"   |
| ## RJSONIO      | "RJSONIO"      | "1.3-1.6"  |
| ## rlang        | "rlang"        | "1.0.6"    |
| ## rmarkdown    | "rmarkdown"    | "2.19"     |
| ## rmeta        | "rmeta"        | "3.0"      |
| ## rngtools     | "rngtools"     | "1.5.2"    |
| ## robustbase   | "robustbase"   | "0.95-0"   |
| ## ROCR         | "ROCR"         | "1.0-11"   |
| ## roxygen2     | "roxygen2"     | "7.2.1"    |
| ## rpart        | "rpart"        | "4.1.19"   |
| ## rprojroot    | "rprojroot"    | "2.0.3"    |
| ## rsample      | "rsample"      | "1.1.1"    |
| ## Rsamtools    | "Rsamtools"    | "2.14.0"   |
| ## RSQLite      | "RSQLite"      | "2.2.20"   |
| ## rstatix      | "rstatix"      | "0.7.1"    |
| ## rstudioapi   | "rstudioapi"   | "0.14"     |
| ## rsvd         | "rsvd"         | "1.0.5"    |
| ## rsvg         | "rsvg"         | "2.4.0"    |
| ## rtracklayer  | "rtracklayer"  | "1.58.0"   |
| ## RUnit        | "RUnit"        | "0.4.32"   |
| ## rversions    | "rversions"    | "2.1.2"    |
| ## rvest        | "rvest"        | "1.0.3"    |
| ## RWeka        | "RWeka"        | "0.4-44"   |
| ## RWekajars    | "RWekajars"    | "3.9.3-2"  |
| ## S4Vectors    | "S4Vectors"    | "0.36.1"   |
| ## sass         | "sass"         | "0.4.4"    |

|                         |                        |             |
|-------------------------|------------------------|-------------|
| ## scales               | "scales"               | "1.2.1"     |
| ## scatterpie           | "scatterpie"           | "0.1.8"     |
| ## scatterplot3d        | "scatterplot3d"        | "0.3-42"    |
| ## scime                | "scime"                | "1.3.5"     |
| ## selectr              | "selectr"              | "0.4-2"     |
| ## sessioninfo          | "sessioninfo"          | "1.2.2"     |
| ## sets                 | "sets"                 | "1.0-21"    |
| ## shadowtext           | "shadowtext"           | "0.1.2"     |
| ## shape                | "shape"                | "1.4.6"     |
| ## shiny                | "shiny"                | "1.7.4"     |
| ## shinydashboard       | "shinydashboard"       | "0.7.2"     |
| ## shinyjs              | "shinyjs"              | "2.1.0"     |
| ## siggenes             | "siggenes"             | "1.72.0"    |
| ## signatureSearch      | "signatureSearch"      | "1.11.1"    |
| ## signatureSearchData  | "signatureSearchData"  | "1.12.0"    |
| ## SingleCellExperiment | "SingleCellExperiment" | "1.20.0"    |
| ## skimr                | "skimr"                | "2.1.5"     |
| ## slam                 | "slam"                 | "0.1-50"    |
| ## slider               | "slider"               | "0.3.0"     |
| ## sm                   | "sm"                   | "2.2-5.7.1" |
| ## snow                 | "snow"                 | "0.4-4"     |
| ## SnowballC            | "SnowballC"            | "0.7.0"     |
| ## softImpute           | "softImpute"           | "1.4-1"     |
| ## sourcetools          | "sourcetools"          | "0.1.7"     |
| ## SparseM              | "SparseM"              | "1.81"      |
| ## sparseMatrixStats    | "sparseMatrixStats"    | "1.10.0"    |
| ## sqldf                | "sqldf"                | "0.4-11"    |
| ## SQUAREM              | "SQUAREM"              | "2021.1"    |
| ## statmod              | "statmod"              | "1.4.37"    |
| ## STRINGdb             | "STRINGdb"             | "2.10.0"    |
| ## stringi              | "stringi"              | "1.7.8"     |
| ## stringr              | "stringr"              | "1.5.0"     |
| ## styler               | "styler"               | "1.8.1"     |
| ## SummarizedExperiment | "SummarizedExperiment" | "1.28.0"    |
| ## sys                  | "sys"                  | "3.4.1"     |
| ## systemfonts          | "systemfonts"          | "1.0.4"     |
| ## TeachingDemos        | "TeachingDemos"        | "2.12"      |
| ## testthat             | "testthat"             | "3.1.5"     |
| ## textshaping          | "textshaping"          | "0.3.6"     |
| ## TFEA.ChIP            | "TFEA.ChIP"            | "1.18.0"    |
| ## tibble               | "tibble"               | "3.1.8"     |
| ## tidygraph            | "tidygraph"            | "1.2.2"     |
| ## tidymodels           | "tidymodels"           | "1.0.0"     |
| ## tidyr                | "tidyr"                | "1.2.1"     |
| ## tidyselect           | "tidyselect"           | "1.2.0"     |
| ## tidytree             | "tidytree"             | "0.4.2"     |
| ## tidyverse            | "tidyverse"            | "1.3.2"     |
| ## timechange           | "timechange"           | "0.1.1"     |
| ## timeDate             | "timeDate"             | "4021.107"  |
| ## tinytex              | "tinytex"              | "0.43"      |
| ## topGO                | "topGO"                | "2.50.0"    |
| ## treeio               | "treeio"               | "1.22.0"    |

|                 |                |             |
|-----------------|----------------|-------------|
| ## truncnorm    | "truncnorm"    | "1.0-8"     |
| ## tune         | "tune"         | "1.0.1"     |
| ## tweenr       | "tweenr"       | "2.0.2"     |
| ## tzdb         | "tzdb"         | "0.3.0"     |
| ## uchardet     | "uchardet"     | "1.1.1"     |
| ## urlchecker   | "urlchecker"   | "1.0.1"     |
| ## usethis      | "usethis"      | "2.1.6"     |
| ## utf8         | "utf8"         | "1.2.2"     |
| ## uuid         | "uuid"         | "1.1-0"     |
| ## vctrs        | "vctrs"        | "0.5.1"     |
| ## vegan        | "vegan"        | "2.6-4"     |
| ## VennDiagram  | "VennDiagram"  | "1.7.3"     |
| ## viridis      | "viridis"      | "0.6.2"     |
| ## viridisLite  | "viridisLite"  | "0.4.1"     |
| ## visNetwork   | "visNetwork"   | "2.1.2"     |
| ## vroom        | "vroom"        | "1.6.0"     |
| ## waldo        | "waldo"        | "0.4.0"     |
| ## warp         | "warp"         | "0.2.0"     |
| ## whisker      | "whisker"      | "0.4"       |
| ## withr        | "withr"        | "2.5.0"     |
| ## workflows    | "workflows"    | "1.1.2"     |
| ## workflowsets | "workflowsets" | "1.0.0"     |
| ## xfun         | "xfun"         | "0.36"      |
| ## xgboost      | "xgboost"      | "1.6.0.1"   |
| ## XML          | "XML"          | "3.99-0.13" |
| ## xml2         | "xml2"         | "1.3.3"     |
| ## xopen        | "xopen"        | "1.0.0"     |
| ## xtable       | "xtable"       | "1.8-4"     |
| ## XVector      | "XVector"      | "0.38.0"    |
| ## yaml         | "yaml"         | "2.3.6"     |
| ## yardstick    | "yardstick"    | "1.1.0"     |
| ## yarn         | "yarn"         | "1.24.0"    |
| ## yulab.utils  | "yulab.utils"  | "0.0.6"     |
| ## zip          | "zip"          | "2.2.2"     |
| ## zlibbioc     | "zlibbioc"     | "1.44.0"    |
| ## base         | "base"         | "4.2.2"     |
| ## boot         | "boot"         | "1.3-28"    |
| ## class        | "class"        | "7.3-20"    |
| ## cluster      | "cluster"      | "2.1.4"     |
| ## codetools    | "codetools"    | "0.2-18"    |
| ## compiler     | "compiler"     | "4.2.2"     |
| ## datasets     | "datasets"     | "4.2.2"     |
| ## foreign      | "foreign"      | "0.8-83"    |
| ## graphics     | "graphics"     | "4.2.2"     |
| ## grDevices    | "grDevices"    | "4.2.2"     |
| ## grid         | "grid"         | "4.2.2"     |
| ## KernSmooth   | "KernSmooth"   | "2.23-20"   |
| ## lattice      | "lattice"      | "0.20-45"   |
| ## MASS         | "MASS"         | "7.3-58.1"  |
| ## Matrix       | "Matrix"       | "1.5-1"     |
| ## methods      | "methods"      | "4.2.2"     |
| ## mgcv         | "mgcv"         | "1.8-41"    |

```
## nlme           "nlme"           "3.1-160"  
## nnet          "nnet"           "7.3-18"  
## parallel     "parallel"       "4.2.2"  
## rpart        "rpart"          "4.1.19"  
## spatial      "spatial"         "7.3-15"  
## splines      "splines"         "4.2.2"  
## stats        "stats"           "4.2.2"  
## stats4       "stats4"          "4.2.2"  
## survival     "survival"        "3.4-0"  
## tcltk        "tcltk"           "4.2.2"  
## tools        "tools"           "4.2.2"  
## utils        "utils"           "4.2.2"
```

# 230510\_rstudio\_sex\_bias\_drugs\_singularity

Jennifer Fisher

05/10/2023

```
System which operations were done on:  
cheaha
```

```
GitHub Repo:  
230321_JLF_Sex_bias_adverse_events
```

```
Directory of operations:  
/data/project/lasseigne_lab/JLF_scratch/230321_JLF_Sex_bias_adverse_events
```

```
GitHub Repo:  
230321_JLF_Sex_bias_adverse_events
```

```
Docker:  
rstudio_sex_bias_drugs (singularity)
```

```
sessionInfo()
```

```
## R version 4.2.2 (2022-10-31)  
## Platform: x86_64-pc-linux-gnu (64-bit)  
## Running under: Ubuntu 22.04.1 LTS  
##  
## Matrix products: default  
## BLAS: /usr/lib/x86_64-linux-gnu/openblas-pthread/libblas.so.3  
## LAPACK: /usr/lib/x86_64-linux-gnu/openblas-pthread/libopenblas-p-r0.3.20.so  
##  
## locale:  
## [1] LC_CTYPE=en_US.UTF-8 LC_NUMERIC=C  
## [3] LC_TIME=en_US.UTF-8 LC_COLLATE=en_US.UTF-8  
## [5] LC_MONETARY=en_US.UTF-8 LC_MESSAGES=en_US.UTF-8  
## [7] LC_PAPER=en_US.UTF-8 LC_NAME=C  
## [9] LC_ADDRESS=C LC_TELEPHONE=C  
## [11] LC_MEASUREMENT=en_US.UTF-8 LC_IDENTIFICATION=C  
##  
## attached base packages:  
## [1] stats graphics grDevices utils datasets methods base  
##  
## loaded via a namespace (and not attached):  
## [1] digest_0.6.31 R6_2.5.1 lifecycle_1.0.3 jsonlite_1.8.4  
## [5] magrittr_2.0.3 evaluate_0.19 stringi_1.7.8 cachem_1.0.6  
## [9] rlang_1.0.6 cli_3.5.0 rstudioapi_0.14 jquerylib_0.1.4  
## [13] bslib_0.4.2 vctrs_0.5.1 rmarkdown_2.19 tools_4.2.2  
## [17] stringr_1.5.0 glue_1.6.2 xfun_0.36 yaml_2.3.6  
## [21] fastmap_1.1.0 compiler_4.2.2 htmltools_0.5.4 knitr_1.41  
## [25] sass_0.4.4
```

```
# Listing packages  
installed.packages()[,c(1,3)]
```

| ##                  | Package            | Version    |
|---------------------|--------------------|------------|
| ## abind            | "abind"            | "1.4-5"    |
| ## affy             | "affy"             | "1.76.0"   |
| ## affyio           | "affyio"           | "1.68.0"   |
| ## amap             | "amap"             | "0.8-19"   |
| ## annotate         | "annotate"         | "1.76.0"   |
| ## AnnotationDbi    | "AnnotationDbi"    | "1.60.0"   |
| ## AnnotationFilter | "AnnotationFilter" | "1.22.0"   |
| ## AnnotationForge  | "AnnotationForge"  | "1.40.0"   |
| ## AnnotationHub    | "AnnotationHub"    | "3.6.0"    |
| ## apcluster        | "apcluster"        | "1.4.10"   |
| ## ape              | "ape"              | "5.6-2"    |
| ## aplot            | "aplot"            | "0.1.9"    |
| ## ashr             | "ashr"             | "2.2-54"   |
| ## askpass          | "askpass"          | "1.1"      |
| ## assertthat       | "assertthat"       | "0.2.1"    |
| ## backports        | "backports"        | "1.4.1"    |
| ## base64           | "base64"           | "2.0.1"    |
| ## base64enc        | "base64enc"        | "0.1-3"    |
| ## base64url        | "base64url"        | "1.4"      |
| ## bayestestR       | "bayestestR"       | "0.13.0"   |
| ## beanplot         | "beanplot"         | "1.3.1"    |
| ## bench            | "bench"            | "1.1.2"    |
| ## BgeeDB           | "BgeeDB"           | "2.24.0"   |
| ## BH               | "BH"               | "1.78.0-0" |
| ## Biobase          | "Biobase"          | "2.58.0"   |
| ## BiocBaseUtils    | "BiocBaseUtils"    | "1.0.0"    |
| ## BiocFileCache    | "BiocFileCache"    | "2.6.0"    |
| ## BiocGenerics     | "BiocGenerics"     | "0.44.0"   |
| ## BiocIO           | "BiocIO"           | "1.8.0"    |
| ## BiocManager      | "BiocManager"      | "1.30.19"  |
| ## BiocParallel     | "BiocParallel"     | "1.32.5"   |
| ## BiocVersion      | "BiocVersion"      | "3.16.0"   |
| ## biomaRt          | "biomaRt"          | "2.54.0"   |
| ## Biostrings       | "Biostrings"       | "2.66.0"   |
| ## bit              | "bit"              | "4.0.5"    |
| ## bit64            | "bit64"            | "4.0.5"    |
| ## bitops           | "bitops"           | "1.0-7"    |
| ## biwt             | "biwt"             | "1.0.1"    |
| ## blob             | "blob"             | "1.2.3"    |
| ## brew             | "brew"             | "1.0-8"    |
| ## brio             | "brio"             | "1.1.3"    |
| ## broom            | "broom"            | "1.0.2"    |
| ## broom.mixed      | "broom.mixed"      | "0.2.9.4"  |
| ## bslib            | "bslib"            | "0.4.2"    |
| ## bumpHunter       | "bumpHunter"       | "1.40.0"   |
| ## BumpyMatrix      | "BumpyMatrix"      | "1.6.0"    |
| ## cachem           | "cachem"           | "1.0.6"    |
| ## callr            | "callr"            | "3.7.3"    |
| ## car              | "car"              | "3.1-1"    |
| ## carData          | "carData"          | "3.0-5"    |
| ## caret            | "caret"            | "6.0-93"   |
| ## Category         | "Category"         | "2.64.0"   |
| ## caTools          | "caTools"          | "1.18.2"   |



|                       |                      |          |
|-----------------------|----------------------|----------|
| ## celestial          | "celestial"          | "1.4.6"  |
| ## cellranger         | "cellranger"         | "1.1.0"  |
| ## checkmate          | "checkmate"          | "2.1.0"  |
| ## ChemmineR          | "ChemmineR"          | "3.50.0" |
| ## chron              | "chron"              | "2.3-58" |
| ## circlize           | "circlize"           | "0.4.15" |
| ## classInt           | "classInt"           | "0.4-8"  |
| ## cli                | "cli"                | "3.5.0"  |
| ## clipr              | "clipr"              | "0.8.0"  |
| ## clock              | "clock"              | "0.6.1"  |
| ## clue               | "clue"               | "0.3-63" |
| ## clusterProfiler    | "clusterProfiler"    | "4.6.0"  |
| ## coda               | "coda"               | "0.19-4" |
| ## CoGAPS             | "CoGAPS"             | "3.18.0" |
| ## cogena             | "cogena"             | "1.32.0" |
| ## colorspace         | "colorspace"         | "2.0-3"  |
| ## combinat           | "combinat"           | "0.0-8"  |
| ## commonmark         | "commonmark"         | "1.8.1"  |
| ## ComplexHeatmap     | "ComplexHeatmap"     | "2.14.0" |
| ## ComplexUpset       | "ComplexUpset"       | "1.3.3"  |
| ## conflicted         | "conflicted"         | "1.1.0"  |
| ## coop               | "coop"               | "0.6-3"  |
| ## CoreGx             | "CoreGx"             | "2.2.0"  |
| ## corrplot           | "corrplot"           | "0.92"   |
| ## cowplot            | "cowplot"            | "1.1.1"  |
| ## cpp11              | "cpp11"              | "0.4.3"  |
| ## crayon             | "crayon"             | "1.5.2"  |
| ## credentials        | "credentials"        | "1.3.2"  |
| ## crosstalk          | "crosstalk"          | "1.2.0"  |
| ## curl               | "curl"               | "4.3.3"  |
| ## customCMPdb        | "customCMPdb"        | "1.8.0"  |
| ## data.table         | "data.table"         | "1.14.6" |
| ## datawizard         | "datawizard"         | "0.6.5"  |
| ## DBI                | "DBI"                | "1.1.3"  |
| ## dbplyr             | "dbplyr"             | "2.2.1"  |
| ## DelayedArray       | "DelayedArray"       | "0.24.0" |
| ## DelayedMatrixStats | "DelayedMatrixStats" | "1.20.0" |
| ## dendextend         | "dendextend"         | "1.16.0" |
| ## DEoptimR           | "DEoptimR"           | "1.0-11" |
| ## desc               | "desc"               | "1.4.2"  |
| ## DESeq2             | "DESeq2"             | "1.38.2" |
| ## devtools           | "devtools"           | "2.4.5"  |
| ## DEXSeq             | "DEXSeq"             | "1.44.0" |
| ## dials              | "dials"              | "1.1.0"  |
| ## DiceDesign         | "DiceDesign"         | "1.9"    |
| ## diffobj            | "diffobj"            | "0.3.5"  |
| ## digest             | "digest"             | "0.6.31" |
| ## discrim            | "discrim"            | "1.0.0"  |
| ## docopt             | "docopt"             | "0.7.1"  |
| ## doParallel         | "doParallel"         | "1.0.17" |
| ## doRNG              | "doRNG"              | "1.8.3"  |
| ## DOSE               | "DOSE"               | "3.24.2" |
| ## dotwhisker         | "dotwhisker"         | "0.7.4"  |
| ## downlit            | "downlit"            | "0.4.2"  |
| ## downloader         | "downloader"         | "0.4"    |

|                       |                      |           |
|-----------------------|----------------------|-----------|
| ## dplyr              | "dplyr"              | "1.0.10"  |
| ## drugbankR          | "drugbankR"          | "1.5"     |
| ## DT                 | "DT"                 | "0.26"    |
| ## dtplyr             | "dtplyr"             | "1.2.2"   |
| ## e1071              | "e1071"              | "1.7-12"  |
| ## earth              | "earth"              | "5.3.1"   |
| ## edgeR              | "edgeR"              | "3.40.1"  |
| ## ellipse            | "ellipse"            | "0.4.3"   |
| ## ellipsis           | "ellipsis"           | "0.3.2"   |
| ## emmeans            | "emmeans"            | "1.8.3"   |
| ## enrichplot         | "enrichplot"         | "1.18.3"  |
| ## EnsDb.Hsapiens.v75 | "EnsDb.Hsapiens.v75" | "2.99.0"  |
| ## ensemblDb          | "ensemblDb"          | "2.22.0"  |
| ## estimability       | "estimability"       | "1.4.1"   |
| ## etrunct            | "etrunct"            | "0.1"     |
| ## evaluate           | "evaluate"           | "0.19"    |
| ## ExperimentHub      | "ExperimentHub"      | "2.6.0"   |
| ## factoextra         | "factoextra"         | "1.0.7"   |
| ## FactoMineR         | "FactoMineR"         | "2.7"     |
| ## fansi              | "fansi"              | "1.0.3"   |
| ## farver             | "farver"             | "2.1.1"   |
| ## fastcluster        | "fastcluster"        | "1.2.3"   |
| ## fastmap            | "fastmap"            | "1.1.0"   |
| ## fastmatch          | "fastmatch"          | "1.1-3"   |
| ## fgsea              | "fgsea"              | "1.24.0"  |
| ## filelock           | "filelock"           | "1.0.2"   |
| ## flashClust         | "flashClust"         | "1.01-2"  |
| ## fmcsR              | "fmcsR"              | "1.40.0"  |
| ## fontawesome        | "fontawesome"        | "0.4.0"   |
| ## forcats            | "forcats"            | "0.5.2"   |
| ## foreach            | "foreach"            | "1.5.2"   |
| ## formatR            | "formatR"            | "1.13"    |
| ## Formula            | "Formula"            | "1.2-4"   |
| ## fs                 | "fs"                 | "1.5.2"   |
| ## furrr              | "furrr"              | "0.3.1"   |
| ## futile.logger      | "futile.logger"      | "1.4.3"   |
| ## futile.options     | "futile.options"     | "1.0.1"   |
| ## future             | "future"             | "1.30.0"  |
| ## future.apply       | "future.apply"       | "1.10.0"  |
| ## gargle             | "gargle"             | "1.2.1"   |
| ## gbm                | "gbm"                | "2.1.8.1" |
| ## genefilter         | "genefilter"         | "1.80.2"  |
| ## geneplotter        | "geneplotter"        | "1.76.0"  |
| ## generics           | "generics"           | "0.1.3"   |
| ## GenomeInfoDb       | "GenomeInfoDb"       | "1.34.4"  |
| ## GenomeInfoDbData   | "GenomeInfoDbData"   | "1.2.9"   |
| ## GenomicAlignments  | "GenomicAlignments"  | "1.34.0"  |
| ## GenomicFeatures    | "GenomicFeatures"    | "1.50.3"  |
| ## GenomicRanges      | "GenomicRanges"      | "1.50.2"  |
| ## GEOquery           | "GEOquery"           | "2.66.0"  |
| ## gert               | "gert"               | "1.9.1"   |
| ## GetoptLong         | "GetoptLong"         | "1.0.5"   |
| ## ggalluvial         | "ggalluvial"         | "0.12.3"  |
| ## ggdendro           | "ggdendro"           | "0.1.23"  |
| ## ggforce            | "ggforce"            | "0.4.1"   |

|                  |                 |           |
|------------------|-----------------|-----------|
| ## ggfun         | "ggfun"         | "0.0.9"   |
| ## ggnewscale    | "ggnewscale"    | "0.4.8"   |
| ## ggplot2       | "ggplot2"       | "3.4.0"   |
| ## ggplotify     | "ggplotify"     | "0.1.0"   |
| ## ggpubr        | "ggpubr"        | "0.5.0"   |
| ## ggraph        | "ggraph"        | "2.1.0"   |
| ## ggrepel       | "ggrepel"       | "0.9.2"   |
| ## ggsci         | "ggsci"         | "2.9"     |
| ## ggsignif      | "ggsignif"      | "0.6.4"   |
| ## ggstance      | "ggstance"      | "0.3.6"   |
| ## ggtree        | "ggtree"        | "3.6.2"   |
| ## gh            | "gh"            | "1.3.1"   |
| ## gitcreds      | "gitcreds"      | "0.1.2"   |
| ## glmnet        | "glmnet"        | "4.1-6"   |
| ## GlobalOptions | "GlobalOptions" | "0.1.2"   |
| ## globals       | "globals"       | "0.16.2"  |
| ## glue          | "glue"          | "1.6.2"   |
| ## GO.db         | "GO.db"         | "3.16.0"  |
| ## googledrive   | "googledrive"   | "2.0.0"   |
| ## googlesheets4 | "googlesheets4" | "1.0.1"   |
| ## GOSemSim      | "GOSemSim"      | "2.24.0"  |
| ## GOstats       | "GOstats"       | "2.64.0"  |
| ## gower         | "gower"         | "1.0.1"   |
| ## GPfit         | "GPfit"         | "1.0-8"   |
| ## gplots        | "gplots"        | "3.1.3"   |
| ## gprofiler2    | "gprofiler2"    | "0.2.1"   |
| ## graph         | "graph"         | "1.76.0"  |
| ## graphlayouts  | "graphlayouts"  | "0.8.4"   |
| ## gridBase      | "gridBase"      | "0.4-7"   |
| ## gridExtra     | "gridExtra"     | "2.3"     |
| ## gridGraphics  | "gridGraphics"  | "0.5-1"   |
| ## GSEABase      | "GSEABase"      | "1.60.0"  |
| ## gson          | "gson"          | "0.0.9"   |
| ## gsubfn        | "gsubfn"        | "0.7"     |
| ## gtable        | "gtable"        | "0.3.1"   |
| ## gtools        | "gtools"        | "3.9.4"   |
| ## hardhat       | "hardhat"       | "1.2.0"   |
| ## hash          | "hash"          | "2.2.6.2" |
| ## haven         | "haven"         | "2.5.1"   |
| ## HDF5Array     | "HDF5Array"     | "1.26.0"  |
| ## HDO.db        | "HDO.db"        | "0.99.1"  |
| ## here          | "here"          | "1.0.1"   |
| ## hexbin        | "hexbin"        | "1.28.2"  |
| ## highr         | "highr"         | "0.10"    |
| ## hms           | "hms"           | "1.1.2"   |
| ## htmltools     | "htmltools"     | "0.5.4"   |
| ## htmlwidgets   | "htmlwidgets"   | "1.6.0"   |
| ## httpuv        | "httpuv"        | "1.6.7"   |
| ## httr          | "httr"          | "1.4.4"   |
| ## hwriter       | "hwriter"       | "1.3.2.1" |
| ## ids           | "ids"           | "1.0.1"   |
| ## igraph        | "igraph"        | "1.3.5"   |
| ## illuminaio    | "illuminaio"    | "0.40.0"  |
| ## infer         | "infer"         | "1.0.4"   |
| ## ini           | "ini"           | "0.3.1"   |

|                           |                          |            |
|---------------------------|--------------------------|------------|
| ## insight                | "insight"                | "0.18.8"   |
| ## interactiveDisplayBase | "interactiveDisplayBase" | "1.36.0"   |
| ## inum                   | "inum"                   | "1.0-4"    |
| ## invgamma               | "invgamma"               | "1.1"      |
| ## ipred                  | "ipred"                  | "0.9-13"   |
| ## IRanges                | "IRanges"                | "2.32.0"   |
| ## IRdisplay              | "IRdisplay"              | "1.1"      |
| ## IRkernel               | "IRkernel"               | "1.3.1"    |
| ## irlba                  | "irlba"                  | "2.3.5.1"  |
| ## isoband                | "isoband"                | "0.2.7"    |
| ## iterators              | "iterators"              | "1.0.14"   |
| ## jquerylib              | "jquerylib"              | "0.1.4"    |
| ## jsonlite               | "jsonlite"               | "1.8.4"    |
| ## KEGGREST               | "KEGGREST"               | "1.38.0"   |
| ## kernlab                | "kernlab"                | "0.9-31"   |
| ## klaR                   | "klaR"                   | "1.7-1"    |
| ## knitr                  | "knitr"                  | "1.41"     |
| ## kohonen                | "kohonen"                | "3.0.11"   |
| ## labeling               | "labeling"               | "0.4.2"    |
| ## labelled               | "labelled"               | "2.10.0"   |
| ## lambda.r               | "lambda.r"               | "1.2.4"    |
| ## later                  | "later"                  | "1.3.0"    |
| ## lava                   | "lava"                   | "1.7.0"    |
| ## lazyeval               | "lazyeval"               | "0.2.2"    |
| ## leaps                  | "leaps"                  | "3.1"      |
| ## lhs                    | "lhs"                    | "1.1.6"    |
| ## libcoin                | "libcoin"                | "1.0-9"    |
| ## Liblinear              | "Liblinear"              | "2.10-22"  |
| ## lifecycle              | "lifecycle"              | "1.0.3"    |
| ## limma                  | "limma"                  | "3.54.0"   |
| ## listenv                | "listenv"                | "0.9.0"    |
| ## littler                | "littler"                | "0.3.17"   |
| ## lme4                   | "lme4"                   | "1.1-31"   |
| ## locfit                 | "locfit"                 | "1.5-9.7"  |
| ## lsa                    | "lsa"                    | "0.73.3"   |
| ## lubridate              | "lubridate"              | "1.9.0"    |
| ## magicaxis              | "magicaxis"              | "2.2.14"   |
| ## magrittr               | "magrittr"               | "2.0.3"    |
| ## mapproj                | "mapproj"                | "1.2.9"    |
| ## maps                   | "maps"                   | "3.4.1"    |
| ## margins                | "margins"                | "0.3.26"   |
| ## markdown               | "markdown"               | "1.4"      |
| ## marray                 | "marray"                 | "1.76.0"   |
| ## mashr                  | "mashr"                  | "0.2.69"   |
| ## MASS                   | "MASS"                   | "7.3-58.1" |
| ## matrixcalc             | "matrixcalc"             | "1.0-6"    |
| ## MatrixGenerics         | "MatrixGenerics"         | "1.10.0"   |
| ## MatrixModels           | "MatrixModels"           | "0.5-1"    |
| ## matrixStats            | "matrixStats"            | "0.63.0"   |
| ## mclust                 | "mclust"                 | "6.0.0"    |
| ## memoise                | "memoise"                | "2.0.1"    |
| ## mime                   | "mime"                   | "0.12"     |
| ## minfi                  | "minfi"                  | "1.44.0"   |
| ## miniUI                 | "miniUI"                 | "0.1.1.1"  |
| ## minqa                  | "minqa"                  | "1.2.5"    |

|                         |                        |              |
|-------------------------|------------------------|--------------|
| ## mixsqp               | "mixsqp"               | "0.3-48"     |
| ## modeldata            | "modeldata"            | "1.0.1"      |
| ## modelenv             | "modelenv"             | "0.1.0"      |
| ## ModelMetrics         | "ModelMetrics"         | "1.2.2.2"    |
| ## modelr               | "modelr"               | "0.1.10"     |
| ## multcompView         | "multcompView"         | "0.1-8"      |
| ## MultiAssayExperiment | "MultiAssayExperiment" | "1.24.0"     |
| ## multtest             | "multtest"             | "2.54.0"     |
| ## munsell              | "munsell"              | "0.5.0"      |
| ## mvtnorm              | "mvtnorm"              | "1.1-3"      |
| ## naivebayes           | "naivebayes"           | "0.9.7"      |
| ## netZooR              | "netZooR"              | "1.2.1"      |
| ## NISTunits            | "NISTunits"            | "1.0.1"      |
| ## nloptr               | "nloptr"               | "2.0.3"      |
| ## NMF                  | "NMF"                  | "0.25"       |
| ## nnet                 | "nnet"                 | "7.3-18"     |
| ## norlrmix             | "norlrmix"             | "1.3-0"      |
| ## numDeriv             | "numDeriv"             | "2016.8-1.1" |
| ## openssl              | "openssl"              | "2.0.5"      |
| ## org.Hs.eg.db         | "org.Hs.eg.db"         | "3.16.0"     |
| ## pamr                 | "pamr"                 | "1.56.1"     |
| ## pandaR               | "pandaR"               | "1.30.0"     |
| ## parallelly           | "parallelly"           | "1.33.0"     |
| ## parameters           | "parameters"           | "0.20.0"     |
| ## parsnip              | "parsnip"              | "1.0.3"      |
| ## partykit             | "partykit"             | "1.2-16"     |
| ## pasilla              | "pasilla"              | "1.26.0"     |
| ## patchwork            | "patchwork"            | "1.1.2"      |
| ## pbdZMQ               | "pbdZMQ"               | "0.3-8"      |
| ## pbkrtest             | "pbkrtest"             | "0.5.1"      |
| ## penalized            | "penalized"            | "0.9-52"     |
| ## permute              | "permute"              | "0.9-7"      |
| ## PharmacGx            | "PharmacGx"            | "3.2.0"      |
| ## pheatmap             | "pheatmap"             | "1.0.12"     |
| ## piano                | "piano"                | "2.14.0"     |
| ## pillar               | "pillar"               | "1.8.1"      |
| ## pkgbuild             | "pkgbuild"             | "1.3.1"      |
| ## pkgconfig            | "pkgconfig"            | "2.0.3"      |
| ## pkgdown              | "pkgdown"              | "2.0.6"      |
| ## pkgload              | "pkgload"              | "1.3.1"      |
| ## PLIER                | "PLIER"                | "0.99.0"     |
| ## plogr                | "plogr"                | "0.2.0"      |
| ## plotly               | "plotly"               | "4.10.1"     |
| ## plotmo               | "plotmo"               | "3.6.2"      |
| ## plotrix              | "plotrix"              | "3.8-2"      |
| ## plyr                 | "plyr"                 | "1.8.8"      |
| ## png                  | "png"                  | "0.1-8"      |
| ## polyclip             | "polyclip"             | "1.10-4"     |
| ## polynom              | "polynom"              | "1.4-1"      |
| ## pracma               | "pracma"               | "2.4.2"      |
| ## praise               | "praise"               | "1.0.0"      |
| ## prediction           | "prediction"           | "0.3.14"     |
| ## preprocessCore       | "preprocessCore"       | "1.60.1"     |
| ## prettyunits          | "prettyunits"          | "1.1.1"      |
| ## pROC                 | "pROC"                 | "1.18.0"     |

|                       |                      |              |
|-----------------------|----------------------|--------------|
| ## processx           | "processx"           | "3.8.0"      |
| ## prodlim            | "prodlim"            | "2019.11.13" |
| ## profmem            | "profmem"            | "0.6.0"      |
| ## profvis            | "profvis"            | "0.3.7"      |
| ## progress           | "progress"           | "1.2.2"      |
| ## progressr          | "progressr"          | "0.12.0"     |
| ## projectR           | "projectR"           | "1.14.0"     |
| ## ProliferativeIndex | "ProliferativeIndex" | "1.0.1"      |
| ## promises           | "promises"           | "1.2.0.1"    |
| ## ProtGenerics       | "ProtGenerics"       | "1.30.0"     |
| ## proto              | "proto"              | "1.0.0"      |
| ## proxy              | "proxy"              | "0.4-27"     |
| ## ps                 | "ps"                 | "1.7.2"      |
| ## purrr              | "purrr"              | "1.0.0"      |
| ## quadprog           | "quadprog"           | "1.5-8"      |
| ## quantreg           | "quantreg"           | "5.94"       |
| ## quantro            | "quantro"            | "1.32.0"     |
| ## questionr          | "questionr"          | "0.7.7"      |
| ## qvalue             | "qvalue"             | "2.30.0"     |
| ## R.cache            | "R.cache"            | "0.16.0"     |
| ## R.methodsS3        | "R.methodsS3"        | "1.8.2"      |
| ## R.oo               | "R.oo"               | "1.25.0"     |
| ## R.utils            | "R.utils"            | "2.12.2"     |
| ## R6                 | "R6"                 | "2.5.1"      |
| ## ragg               | "ragg"               | "1.2.4"      |
| ## randomForest       | "randomForest"       | "4.7-1.1"    |
| ## ranger             | "ranger"             | "0.14.1"     |
| ## RANN               | "RANN"               | "2.6.1"      |
| ## rappdirs           | "rappdirs"           | "0.3.3"      |
| ## RBGL               | "RBGL"               | "1.74.0"     |
| ## rcmdcheck          | "rcmdcheck"          | "1.4.0"      |
| ## RColorBrewer       | "RColorBrewer"       | "1.1-3"      |
| ## Rcpp               | "Rcpp"               | "1.0.9"      |
| ## RcppArmadillo      | "RcppArmadillo"      | "0.11.4.2.1" |
| ## RcppEigen          | "RcppEigen"          | "0.3.3.9.3"  |
| ## RcppGSL            | "RcppGSL"            | "0.3.12"     |
| ## RcppTOML           | "RcppTOML"           | "0.1.7"      |
| ## RCurl              | "RCurl"              | "1.98-1.9"   |
| ## RCy3               | "RCy3"               | "2.18.0"     |
| ## reactome.db        | "reactome.db"        | "1.82.0"     |
| ## readr              | "readr"              | "2.1.3"      |
| ## readxl             | "readxl"             | "1.4.1"      |
| ## recipes            | "recipes"            | "1.0.3"      |
| ## recount3           | "recount3"           | "1.8.0"      |
| ## registry           | "registry"           | "0.5-1"      |
| ## relations          | "relations"          | "0.6-12"     |
| ## rematch            | "rematch"            | "1.0.1"      |
| ## rematch2           | "rematch2"           | "2.1.2"      |
| ## remotes            | "remotes"            | "2.4.2"      |
| ## repr               | "repr"               | "1.1.4"      |
| ## reprex             | "reprex"             | "2.0.2"      |
| ## reshape            | "reshape"            | "0.8.9"      |
| ## reshape2           | "reshape2"           | "1.4.4"      |
| ## restfulr           | "restfulr"           | "0.0.15"     |
| ## reticulate         | "reticulate"         | "1.26"       |

|                         |                        |             |
|-------------------------|------------------------|-------------|
| ## Rgraphviz            | "Rgraphviz"            | "2.42.0"    |
| ## rhdf5                | "rhdf5"                | "2.42.0"    |
| ## rhdf5filters         | "rhdf5filters"         | "1.10.0"    |
| ## Rhdf5lib             | "Rhdf5lib"             | "1.20.0"    |
| ## Rhtslib              | "Rhtslib"              | "2.0.0"     |
| ## rJava                | "rJava"                | "1.0-6"     |
| ## rjson                | "rjson"                | "0.2.21"    |
| ## RJSONIO              | "RJSONIO"              | "1.3-1.6"   |
| ## rlang                | "rlang"                | "1.0.6"     |
| ## rmarkdown            | "rmarkdown"            | "2.19"      |
| ## rmeta                | "rmeta"                | "3.0"       |
| ## rngtools             | "rngtools"             | "1.5.2"     |
| ## robustbase           | "robustbase"           | "0.95-0"    |
| ## ROCR                 | "ROCR"                 | "1.0-11"    |
| ## roxygen2             | "roxygen2"             | "7.2.1"     |
| ## rpart                | "rpart"                | "4.1.19"    |
| ## rprojroot            | "rprojroot"            | "2.0.3"     |
| ## rsample              | "rsample"              | "1.1.1"     |
| ## Rsamtools            | "Rsamtools"            | "2.14.0"    |
| ## RSQLite              | "RSQLite"              | "2.2.20"    |
| ## rstatix              | "rstatix"              | "0.7.1"     |
| ## rstudioapi           | "rstudioapi"           | "0.14"      |
| ## rsvd                 | "rsvd"                 | "1.0.5"     |
| ## rsvg                 | "rsvg"                 | "2.4.0"     |
| ## rtracklayer          | "rtracklayer"          | "1.58.0"    |
| ## RUnit                | "RUnit"                | "0.4.32"    |
| ## rversions            | "rversions"            | "2.1.2"     |
| ## rvest                | "rvest"                | "1.0.3"     |
| ## RWeka                | "RWeka"                | "0.4-44"    |
| ## RWekajars            | "RWekajars"            | "3.9.3-2"   |
| ## S4Vectors            | "S4Vectors"            | "0.36.1"    |
| ## sass                 | "sass"                 | "0.4.4"     |
| ## scales               | "scales"               | "1.2.1"     |
| ## scatterpie           | "scatterpie"           | "0.1.8"     |
| ## scatterplot3d        | "scatterplot3d"        | "0.3-42"    |
| ## scime                | "scime"                | "1.3.5"     |
| ## selectr              | "selectr"              | "0.4-2"     |
| ## sessioninfo          | "sessioninfo"          | "1.2.2"     |
| ## sets                 | "sets"                 | "1.0-21"    |
| ## shadowtext           | "shadowtext"           | "0.1.2"     |
| ## shape                | "shape"                | "1.4.6"     |
| ## shiny                | "shiny"                | "1.7.4"     |
| ## shinydashboard       | "shinydashboard"       | "0.7.2"     |
| ## shinyjs              | "shinyjs"              | "2.1.0"     |
| ## siggenes             | "siggenes"             | "1.72.0"    |
| ## signatureSearch      | "signatureSearch"      | "1.11.1"    |
| ## signatureSearchData  | "signatureSearchData"  | "1.12.0"    |
| ## SingleCellExperiment | "SingleCellExperiment" | "1.20.0"    |
| ## skimr                | "skimr"                | "2.1.5"     |
| ## slam                 | "slam"                 | "0.1-50"    |
| ## slider               | "slider"               | "0.3.0"     |
| ## sm                   | "sm"                   | "2.2-5.7.1" |
| ## snow                 | "snow"                 | "0.4-4"     |
| ## SnowballC            | "SnowballC"            | "0.7.0"     |
| ## softImpute           | "softImpute"           | "1.4-1"     |

|                         |                        |             |
|-------------------------|------------------------|-------------|
| ## sourcetools          | "sourcetools"          | "0.1.7"     |
| ## SparseM              | "SparseM"              | "1.81"      |
| ## sparseMatrixStats    | "sparseMatrixStats"    | "1.10.0"    |
| ## sqldf                | "sqldf"                | "0.4-11"    |
| ## SQUAREM              | "SQUAREM"              | "2021.1"    |
| ## statmod              | "statmod"              | "1.4.37"    |
| ## STRINGdb             | "STRINGdb"             | "2.10.0"    |
| ## stringi              | "stringi"              | "1.7.8"     |
| ## stringr              | "stringr"              | "1.5.0"     |
| ## styler               | "styler"               | "1.8.1"     |
| ## SummarizedExperiment | "SummarizedExperiment" | "1.28.0"    |
| ## sys                  | "sys"                  | "3.4.1"     |
| ## systemfonts          | "systemfonts"          | "1.0.4"     |
| ## TeachingDemos        | "TeachingDemos"        | "2.12"      |
| ## testthat             | "testthat"             | "3.1.5"     |
| ## textshaping          | "textshaping"          | "0.3.6"     |
| ## TFEA.ChIP            | "TFEA.ChIP"            | "1.18.0"    |
| ## tibble               | "tibble"               | "3.1.8"     |
| ## tidygraph            | "tidygraph"            | "1.2.2"     |
| ## tidymodels           | "tidymodels"           | "1.0.0"     |
| ## tidyr                | "tidyr"                | "1.2.1"     |
| ## tidyselect           | "tidyselect"           | "1.2.0"     |
| ## tidytree             | "tidytree"             | "0.4.2"     |
| ## tidyverse            | "tidyverse"            | "1.3.2"     |
| ## timechange           | "timechange"           | "0.1.1"     |
| ## timeDate             | "timeDate"             | "4021.107"  |
| ## tinytex              | "tinytex"              | "0.43"      |
| ## topGO                | "topGO"                | "2.50.0"    |
| ## treeio               | "treeio"               | "1.22.0"    |
| ## truncnorm            | "truncnorm"            | "1.0-8"     |
| ## tune                 | "tune"                 | "1.0.1"     |
| ## tweenr               | "tweenr"               | "2.0.2"     |
| ## tzdb                 | "tzdb"                 | "0.3.0"     |
| ## uchardet             | "uchardet"             | "1.1.1"     |
| ## urlchecker           | "urlchecker"           | "1.0.1"     |
| ## usethis              | "usethis"              | "2.1.6"     |
| ## utf8                 | "utf8"                 | "1.2.2"     |
| ## uuid                 | "uuid"                 | "1.1-0"     |
| ## vctrs                | "vctrs"                | "0.5.1"     |
| ## vegan                | "vegan"                | "2.6-4"     |
| ## VennDiagram          | "VennDiagram"          | "1.7.3"     |
| ## viridis              | "viridis"              | "0.6.2"     |
| ## viridisLite          | "viridisLite"          | "0.4.1"     |
| ## visNetwork           | "visNetwork"           | "2.1.2"     |
| ## vroom                | "vroom"                | "1.6.0"     |
| ## waldo                | "waldo"                | "0.4.0"     |
| ## warp                 | "warp"                 | "0.2.0"     |
| ## whisker              | "whisker"              | "0.4"       |
| ## withr                | "withr"                | "2.5.0"     |
| ## workflows            | "workflows"            | "1.1.2"     |
| ## workflowsets         | "workflowsets"         | "1.0.0"     |
| ## xfun                 | "xfun"                 | "0.36"      |
| ## xgboost              | "xgboost"              | "1.6.0.1"   |
| ## XML                  | "XML"                  | "3.99-0.13" |
| ## xml2                 | "xml2"                 | "1.3.3"     |



```
## xopen "xopen" "1.0.0"  
## xtable "xtable" "1.8-4"  
## XVector "XVector" "0.38.0"  
## yaml "yaml" "2.3.6"  
## yardstick "yardstick" "1.1.0"  
## yarn "yarn" "1.24.0"  
## yulab.utils "yulab.utils" "0.0.6"  
## zip "zip" "2.2.2"  
## zlibbioc "zlibbioc" "1.44.0"  
## base "base" "4.2.2"  
## boot "boot" "1.3-28"  
## class "class" "7.3-20"  
## cluster "cluster" "2.1.4"  
## codetools "codetools" "0.2-18"  
## compiler "compiler" "4.2.2"  
## datasets "datasets" "4.2.2"  
## foreign "foreign" "0.8-83"  
## graphics "graphics" "4.2.2"  
## grDevices "grDevices" "4.2.2"  
## grid "grid" "4.2.2"  
## KernSmooth "KernSmooth" "2.23-20"  
## lattice "lattice" "0.20-45"  
## MASS "MASS" "7.3-58.1"  
## Matrix "Matrix" "1.5-1"  
## methods "methods" "4.2.2"  
## mgcv "mgcv" "1.8-41"  
## nlme "nlme" "3.1-160"  
## nnet "nnet" "7.3-18"  
## parallel "parallel" "4.2.2"  
## rpart "rpart" "4.1.19"  
## spatial "spatial" "7.3-15"  
## splines "splines" "4.2.2"  
## stats "stats" "4.2.2"  
## stats4 "stats4" "4.2.2"  
## survival "survival" "3.4-0"  
## tcltk "tcltk" "4.2.2"  
## tools "tools" "4.2.2"  
## utils "utils" "4.2.2"
```

R version 4.0.5 (2021-03-31)  
Platform: x86\_64-conda-linux-gnu (64-bit)  
Running under: Red Hat Enterprise Linux

Matrix products: default  
BLAS/LAPACK: /data/user/jfisher7/.conda/envs/SR\_TAU\_CELL/lib/  
libopenblas-r0.3.18.so

locale:  
[1] C

attached base packages:  
[1] stats graphics grDevices utils datasets methods base

loaded via a namespace (and not attached):  
[1] compiler\_4.0.5  
[1] "Listing packages"

|                  | Package            | Version    |
|------------------|--------------------|------------|
| AnnotationDbi    | "AnnotationDbi"    | "1.52.0"   |
| AnnotationHub    | "AnnotationHub"    | "2.22.1"   |
| BH               | "BH"               | "1.78.0-0" |
| Biobase          | "Biobase"          | "2.50.0"   |
| BiocFileCache    | "BiocFileCache"    | "1.14.0"   |
| BiocGenerics     | "BiocGenerics"     | "0.36.1"   |
| BiocManager      | "BiocManager"      | "1.30.16"  |
| BiocParallel     | "BiocParallel"     | "1.24.1"   |
| BiocVersion      | "BiocVersion"      | "3.12.0"   |
| DBI              | "DBI"              | "1.1.2"    |
| D0.db            | "D0.db"            | "2.9"      |
| DOSE             | "DOSE"             | "3.16.0"   |
| DT               | "DT"               | "0.20"     |
| DelayedArray     | "DelayedArray"     | "0.16.3"   |
| ExperimentHub    | "ExperimentHub"    | "1.16.1"   |
| G0.db            | "G0.db"            | "3.12.1"   |
| G0SemSim         | "G0SemSim"         | "2.16.1"   |
| GSEABase         | "GSEABase"         | "1.52.1"   |
| GenomeInfoDb     | "GenomeInfoDb"     | "1.26.7"   |
| GenomeInfoDbData | "GenomeInfoDbData" | "1.2.4"    |
| GenomicRanges    | "GenomicRanges"    | "1.42.0"   |
| HDF5Array        | "HDF5Array"        | "1.18.1"   |
| IRanges          | "IRanges"          | "2.24.1"   |
| MASS             | "MASS"             | "7.3-55"   |
| Matrix           | "Matrix"           | "1.4-0"    |
| MatrixGenerics   | "MatrixGenerics"   | "1.2.1"    |
| R.methodsS3      | "R.methodsS3"      | "1.8.1"    |
| R.oo             | "R.oo"             | "1.24.0"   |
| R.utils          | "R.utils"          | "2.11.0"   |
| R6               | "R6"               | "2.5.1"    |
| RColorBrewer     | "RColorBrewer"     | "1.1-2"    |
| RCurl            | "RCurl"            | "1.98-1.5" |

|                      |                        |              |
|----------------------|------------------------|--------------|
| RSQLite              | "RSQLite"              | "2.2.9"      |
| Rcpp                 | "Rcpp"                 | "1.0.8"      |
| RcppArmadillo        | "RcppArmadillo"        | "0.10.8.1.0" |
| RcppEigen            | "RcppEigen"            | "0.3.3.9.1"  |
| Rhdf5lib             | "Rhdf5lib"             | "1.12.1"     |
| S4Vectors            | "S4Vectors"            | "0.28.1"     |
| SummarizedExperiment | "SummarizedExperiment" | "1.20.0"     |
| XML                  | "XML"                  | "3.99-0.8"   |
| XVector              | "XVector"              | "0.30.0"     |
| affy                 | "affy"                 | "1.68.0"     |
| affyio               | "affyio"               | "1.60.0"     |
| annotate             | "annotate"             | "1.68.0"     |
| askpass              | "askpass"              | "1.1"        |
| assertthat           | "assertthat"           | "0.2.1"      |
| backports            | "backports"            | "1.4.1"      |
| base                 | "base"                 | "4.0.5"      |
| base64enc            | "base64enc"            | "0.1-3"      |
| bit                  | "bit"                  | "4.0.4"      |
| bit64                | "bit64"                | "4.0.5"      |
| bitops               | "bitops"               | "1.0-7"      |
| blob                 | "blob"                 | "1.2.2"      |
| brio                 | "brio"                 | "1.1.3"      |
| broom                | "broom"                | "0.7.12"     |
| bslib                | "bslib"                | "0.3.1"      |
| cachem               | "cachem"               | "1.0.6"      |
| callr                | "callr"                | "3.7.0"      |
| cellranger           | "cellranger"           | "1.1.0"      |
| cli                  | "cli"                  | "3.1.1"      |
| clipr                | "clipr"                | "0.7.1"      |
| clusterProfiler      | "clusterProfiler"      | "3.18.1"     |
| colorspace           | "colorspace"           | "2.0-2"      |
| commonmark           | "commonmark"           | "1.7"        |
| compiler             | "compiler"             | "4.0.5"      |
| cowplot              | "cowplot"              | "1.1.1"      |
| cpp11                | "cpp11"                | "0.4.2"      |
| crayon               | "crayon"               | "1.4.2"      |
| crosstalk            | "crosstalk"            | "1.2.0"      |
| curl                 | "curl"                 | "4.3.2"      |
| data.table           | "data.table"           | "1.14.2"     |
| datasets             | "datasets"             | "4.0.5"      |
| dbplyr               | "dbplyr"               | "2.1.1"      |
| desc                 | "desc"                 | "1.4.0"      |
| diffobj              | "diffobj"              | "0.3.5"      |
| digest               | "digest"               | "0.6.29"     |
| downloader           | "downloader"           | "0.4"        |
| dplyr                | "dplyr"                | "1.0.7"      |
| dtplyr               | "dtplyr"               | "1.2.1"      |
| ellipsis             | "ellipsis"             | "0.3.2"      |
| enrichplot           | "enrichplot"           | "1.10.2"     |
| evaluate             | "evaluate"             | "0.14"       |

|                        |                          |           |
|------------------------|--------------------------|-----------|
| fansi                  | "fansi"                  | "1.0.2"   |
| farver                 | "farver"                 | "2.1.0"   |
| fastmap                | "fastmap"                | "1.1.0"   |
| fastmatch              | "fastmatch"              | "1.1-3"   |
| fgsea                  | "fgsea"                  | "1.16.0"  |
| fontawesome            | "fontawesome"            | "0.2.2"   |
| forcats                | "forcats"                | "0.5.1"   |
| formatR                | "formatR"                | "1.11"    |
| fs                     | "fs"                     | "1.5.2"   |
| futile.logger          | "futile.logger"          | "1.4.3"   |
| futile.options         | "futile.options"         | "1.0.1"   |
| gargle                 | "gargle"                 | "1.2.0"   |
| generics               | "generics"               | "0.1.2"   |
| ggforce                | "ggforce"                | "0.3.3"   |
| ggfun                  | "ggfun"                  | "0.0.5"   |
| ggplot2                | "ggplot2"                | "3.3.5"   |
| ggraph                 | "ggraph"                 | "2.0.5"   |
| ggrepel                | "ggrepel"                | "0.9.1"   |
| glue                   | "glue"                   | "1.6.1"   |
| googledrive            | "googledrive"            | "2.0.0"   |
| googlesheets4          | "googlesheets4"          | "1.0.0"   |
| grDevices              | "grDevices"              | "4.0.5"   |
| graph                  | "graph"                  | "1.68.0"  |
| graphics               | "graphics"               | "4.0.5"   |
| graphlayouts           | "graphlayouts"           | "0.8.0"   |
| grid                   | "grid"                   | "4.0.5"   |
| gridExtra              | "gridExtra"              | "2.3"     |
| gtable                 | "gtable"                 | "0.3.0"   |
| haven                  | "haven"                  | "2.4.3"   |
| highr                  | "highr"                  | "0.9"     |
| hms                    | "hms"                    | "1.1.1"   |
| htmltools              | "htmltools"              | "0.5.2"   |
| htmlwidgets            | "htmlwidgets"            | "1.5.4"   |
| httpuv                 | "httpuv"                 | "1.6.5"   |
| httr                   | "httr"                   | "1.4.2"   |
| ids                    | "ids"                    | "1.0.1"   |
| igraph                 | "igraph"                 | "1.2.11"  |
| interactiveDisplayBase | "interactiveDisplayBase" | "1.28.0"  |
| isoband                | "isoband"                | "0.2.5"   |
| jquerylib              | "jquerylib"              | "0.1.4"   |
| jsonlite               | "jsonlite"               | "1.7.3"   |
| knitr                  | "knitr"                  | "1.37"    |
| labeling               | "labeling"               | "0.4.2"   |
| lambda.r               | "lambda.r"               | "1.2.4"   |
| later                  | "later"                  | "1.3.0"   |
| lattice                | "lattice"                | "0.20-45" |
| lazyeval               | "lazyeval"               | "0.2.2"   |
| lifecycle              | "lifecycle"              | "1.0.1"   |
| limma                  | "limma"                  | "3.46.0"  |
| lubridate              | "lubridate"              | "1.8.0"   |

|                     |                       |           |
|---------------------|-----------------------|-----------|
| magrittr            | "magrittr"            | "2.0.2"   |
| matrixStats         | "matrixStats"         | "0.61.0"  |
| memoise             | "memoise"             | "2.0.1"   |
| methods             | "methods"             | "4.0.5"   |
| mgcv                | "mgcv"                | "1.8-38"  |
| mime                | "mime"                | "0.12"    |
| modelr              | "modelr"              | "0.1.8"   |
| munsell             | "munsell"             | "0.5.0"   |
| nlme                | "nlme"                | "3.1-155" |
| openssl             | "openssl"             | "1.4.6"   |
| parallel            | "parallel"            | "4.0.5"   |
| pillar              | "pillar"              | "1.7.0"   |
| pkgconfig           | "pkgconfig"           | "2.0.3"   |
| pkgload             | "pkgload"             | "1.2.4"   |
| plogr               | "plogr"               | "0.2.0"   |
| plyr                | "plyr"                | "1.8.6"   |
| polyclip            | "polyclip"            | "1.10-0"  |
| praise              | "praise"              | "1.0.0"   |
| preprocessCore      | "preprocessCore"      | "1.52.1"  |
| prettyunits         | "prettyunits"         | "1.1.1"   |
| processx            | "processx"            | "3.5.2"   |
| progress            | "progress"            | "1.2.2"   |
| promises            | "promises"            | "1.2.0.1" |
| ps                  | "ps"                  | "1.6.0"   |
| purrr               | "purrr"               | "0.3.4"   |
| qvalue              | "qvalue"              | "2.22.0"  |
| rappdirs            | "rappdirs"            | "0.3.3"   |
| reactome.db         | "reactome.db"         | "1.74.0"  |
| readr               | "readr"               | "2.1.2"   |
| readxl              | "readxl"              | "1.3.1"   |
| rematch             | "rematch"             | "1.0.1"   |
| rematch2            | "rematch2"            | "2.1.2"   |
| reprex              | "reprex"              | "2.0.1"   |
| reshape2            | "reshape2"            | "1.4.4"   |
| rhdf5               | "rhdf5"               | "2.34.0"  |
| rhdf5filters        | "rhdf5filters"        | "1.2.1"   |
| rlang               | "rlang"               | "1.0.0"   |
| rmarkdown           | "rmarkdown"           | "2.11"    |
| rprojroot           | "rprojroot"           | "2.0.2"   |
| rstudioapi          | "rstudioapi"          | "0.13"    |
| rvcheck             | "rvcheck"             | "0.2.1"   |
| rvest               | "rvest"               | "1.0.2"   |
| sass                | "sass"                | "0.4.0"   |
| scales              | "scales"              | "1.1.1"   |
| scatterpie          | "scatterpie"          | "0.1.7"   |
| selectr             | "selectr"             | "0.4-2"   |
| shadowtext          | "shadowtext"          | "0.1.1"   |
| shiny               | "shiny"               | "1.7.1"   |
| signatureSearch     | "signatureSearch"     | "1.4.6"   |
| signatureSearchData | "signatureSearchData" | "1.4.0"   |

|             |               |          |
|-------------|---------------|----------|
| snow        | "snow"        | "0.4-4"  |
| sourcetools | "sourcetools" | "0.1.7"  |
| splines     | "splines"     | "4.0.5"  |
| stats       | "stats"       | "4.0.5"  |
| stats4      | "stats4"      | "4.0.5"  |
| stringi     | "stringi"     | "1.7.6"  |
| stringr     | "stringr"     | "1.4.0"  |
| sys         | "sys"         | "3.4"    |
| tcltk       | "tcltk"       | "4.0.5"  |
| testthat    | "testthat"    | "3.1.2"  |
| tibble      | "tibble"      | "3.1.6"  |
| tidygraph   | "tidygraph"   | "1.2.0"  |
| tidyr       | "tidyr"       | "1.2.0"  |
| tidyselect  | "tidyselect"  | "1.1.1"  |
| tidyverse   | "tidyverse"   | "1.3.1"  |
| tinytex     | "tinytex"     | "0.36"   |
| tools       | "tools"       | "4.0.5"  |
| tweenr      | "tweenr"      | "1.0.2"  |
| tzdb        | "tzdb"        | "0.2.0"  |
| utf8        | "utf8"        | "1.2.2"  |
| utils       | "utils"       | "4.0.5"  |
| uuid        | "uuid"        | "1.0-3"  |
| vctrs       | "vctrs"       | "0.3.8"  |
| viridis     | "viridis"     | "0.6.2"  |
| viridisLite | "viridisLite" | "0.4.0"  |
| visNetwork  | "visNetwork"  | "2.1.0"  |
| vroom       | "vroom"       | "1.5.7"  |
| waldo       | "waldo"       | "0.3.1"  |
| withr       | "withr"       | "2.4.3"  |
| xfun        | "xfun"        | "0.29"   |
| xml2        | "xml2"        | "1.3.3"  |
| xtable      | "xtable"      | "1.8-4"  |
| yaml        | "yaml"        | "2.2.2"  |
| yulab.utils | "yulab.utils" | "0.0.4"  |
| zlibbioc    | "zlibbioc"    | "1.36.0" |
